# Supplementary material for: A Model for the Evolution of the Mammalian T-cell Receptor α/δ and μ Loci Based on Evidence from the Duckbill Platypus
Source: PubMed Central journal article supplement — Mol Biol Evol. 2012 Jun 21;29(10):3205–14. doi: 10.1093/molbev/mss128 (PMC3457774; doi:10.1093/molbev/mss128), 2012-06-21
Supplement: supp_mss128_Supplementary_Table2.pdf [file supp_mss128_Supplementary_Table2.pdf]

**Supplementary Table 2. GenBank accession numbers for sequences used in Figure 3.**

| <b>Sequence</b>         | <b>GenBank #</b> | <b>Sequence</b>         | <b>GenBank #</b> |
|-------------------------|------------------|-------------------------|------------------|
| Human 147               | X64147           | Llama 133               | AY342133         |
| Human 714               | X05714           | Llama 486               | AF441486         |
| Human 161               | AY393161         | Camel 173               | AJ245173         |
| Human 199               | AF471499         | Camel 669               | FN665669         |
| Human 547               | FM206547         | Horse 431               | DQ125431         |
| Human 668               | ACS95668         | Elephant 115            | XM_003418115     |
| Human 926               | AB202926         | Possum 440              | AAT40440         |
| Human 904               | AB202904         | Possum 442              | AAT40442         |
| Sumatran Orangutan 722  | CR857722         | Opossum 113             | AF012113         |
| Olive Baboon 362        | AF416362         | Echidna 012             | AAN33012         |
| Crab-eating Macaque 228 | AB174228         | Echidna 806             | AAM60806         |
| Rhesus Monkey 968       | HM044968         | Echidna 800             | AAM60800         |
| Rhesus monkey 846       | DQ437846         | Echidna 801             | AAM60801         |
| Marmoset 359            | AF397359         | Echidna 812             | AAM60812         |
| Marmoset 164            | AF298164         | Echidna 803             | AAM60803         |
| Marmoset 379            | AF397379         | Echidna 813             | AAM60813         |
| Baboon 344              | AF416344         | Platypus 314            | AF381314         |
| Gibbon 670              | XM_003281670     | Platypus 294            | AF381294         |
| B. flying Fox 169       | GQ427169         | Platypus 317            | AF381317         |
| Mouse 821               | CH466821         | Platypus 315            | AF381315         |
| Mouse 185               | AM262185         | Platypus 319            | AF381319         |
| Mouse 021               | M27021           | Platypus V $\mu$ 61     | GU458339         |
| Mouse 569               | K01569           | Platypus V $\mu$ 29     | GU458342         |
| Mouse 869               | AF459869         | Platypus V $\mu$ 79     | GU458340         |
| Mouse 508               | CAA85508         | Platypus VH $\delta$    | Scaf588: 341486  |
| Rat 756                 | AM293756         | Chicken VH $\delta$     | Chr10: 82072     |
| Hamster 537             | JH002537         | Turkey VH $\delta$      | Chr10: 2951779   |
| Dog 643                 | XM_843643        | Duck VH $\delta$        | AF415216         |
| Cat 633                 | AB609633         | Zebra finch VH $\delta$ | Chr27: 3046287   |
| Dolphin 195             | AJ320195         | Chicken 326             | M30326           |
| Cow 765                 | DQ485765         | Chicken 329             | M30329           |
| Cow 502                 | AF015502         | Chicken 324             | M30324           |
| Cow 841                 | AAB68841         | Chicken 333             | M30333           |
| Sheep 104               | AJ505104         | Chicken 327             | M30327           |
| Sheep 120               | AJ505120         | Frog 255                | M27255           |
| Goat 748                | EU344748         | Frog 681                | M24681           |
| Goat 604                | EU182604         | Frog VH $\delta$ 5.1    | GQ262028         |
| Llama 297               | AM180297         | Frog 677                | M24677           |
| Llama 575               | AY544575         |                         |                  |
