# Supplementary material for: A Model for the Evolution of the Mammalian T-cell Receptor α/δ and μ Loci Based on Evidence from the Duckbill Platypus
Source: PubMed Central journal article supplement — Mol Biol Evol. 2012 Jun 21;29(10):3205–14. doi: 10.1093/molbev/mss128 (PMC3457774; doi:10.1093/molbev/mss128), 2012-06-21
Supplement: supp_mss128_Supplementary_table_1.pdf [file supp_mss128_Supplementary_table_1.pdf]

**Supplementary Table 1. Location of the platypus TCR $\alpha$ / $\delta$  V gene segments in Scaffold 588 of the current assembly (*Ornithorhynchus anatinus*-5.0.).**

|                 |                 |                  |                 |
|-----------------|-----------------|------------------|-----------------|
| V $\alpha$ 1    | 495011 - 494723 | V $\alpha$ 11.3  | 372344 - 372056 |
| V $\alpha$ 2.1  | 479971 - 479685 | V $\alpha$ 3.6   | 370446 - 370163 |
| V $\alpha$ 2.2  | 478126 - 477844 | V $\alpha$ 8.16  | 367602 - 367317 |
| V $\alpha$ 3.1  | 475438 - 475153 | V $\alpha$ 12    | 364461 - 364177 |
| V $\alpha$ 3.2  | 472621 - 472336 | V $\alpha$ 4.11  | 362313 - 362025 |
| V $\alpha$ 4.1  | 470070 - 469782 | V $\alpha$ 4.12  | 359388 - 359098 |
| V $\alpha$ 5.1  | 469177 - 468891 | V $\alpha$ 7.2   | 357807 - 357506 |
| V $\alpha$ 6.1  | 466695 - 466399 | V $\alpha$ 8.17  | 355453 - 355165 |
| V $\alpha$ 6.2  | 465165 - 464885 | V $\alpha$ 13    | 351501 - 351208 |
| V $\alpha$ 3.3  | 461892 - 461803 | V $\alpha$ 4.13  | 349533 - 349243 |
| V $\alpha$ 3.4  | 458490 - 458205 | V $\alpha$ 4.14  | 347266 - 346971 |
| V $\alpha$ 7.1  | 455694 - 455413 | V $\alpha$ 4.15  | 342649 - 342359 |
| V $\alpha$ 3.5  | 452618 - 452331 | V $\alpha$ 4.16  | 336887 - 336597 |
| V $\alpha$ 8.1  | 450607 - 450315 | V $\alpha$ 4.17  | 329802 - 329513 |
| V $\alpha$ 9    | 445415 - 445191 | V $\alpha$ 5.2   | 326149 - 325854 |
| V $\alpha$ 8.2  | 442820 - 442530 | V $\alpha$ 4.18  | 322500 - 322213 |
| V $\alpha$ 8.3  | 441417 - 441128 | V $\alpha$ 4.19  | 319544 - 319247 |
| V $\alpha$ 9.4  | 439206 - 438914 | V $\alpha$ 4.20  | 316362 - 316075 |
| V $\alpha$ 8.5  | 436795 - 436506 | V $\alpha$ 4.21  | 313076 - 312786 |
| V $\alpha$ 8.6  | 434410 - 434118 | V $\alpha$ 4.22  | 310214 - 309924 |
| V $\alpha$ 8.7  | 431702 - 431413 | V $\alpha$ 4.23  | 306776 - 306483 |
| V $\alpha$ 8.8  | 428468 - 428172 | V $\alpha$ 4.24  | 303559 - 303269 |
| V $\alpha$ 8.9  | 426016 - 425723 | V $\alpha$ 4.25  | 300294 - 300004 |
| V $\alpha$ 8.10 | 425204 - 424974 | V $\alpha$ 6.3   | 298239 - 297944 |
| V $\alpha$ 8.11 | 424140 - 423848 | V $\alpha$ 8.18  | 296965 - 296676 |
| V $\alpha$ 10.1 | 421711 - 421419 | V $\alpha$ 6.4   | 295209 - 294929 |
| V $\alpha$ 8.12 | 419522 - 419229 | V $\alpha$ 14.1  | 294255 - 293966 |
| V $\alpha$ 10.2 | 416483 - 416189 | V $\alpha$ 14.2  | 292483 - 292194 |
| V $\alpha$ 8.13 | 414810 - 414509 | V $\alpha$ 14.3  | 290605 - 290315 |
| V $\alpha$ 4.2  | 413500 - 413208 | V $\alpha$ 14.4  | 288736 - 288447 |
| V $\alpha$ 4.3  | 411166 - 410876 | V $\alpha$ 14.5  | 286955 - 286665 |
| V $\alpha$ 4.4  | 408958 - 408668 | V $\alpha$ 14.6  | 286095 - 285805 |
| V $\alpha$ 8.14 | 406808 - 406515 | V $\alpha$ 15.1  | 280497 - 280208 |
| V $\alpha$ 4.5  | 405040 - 404746 | V $\alpha$ 15.2  | 277896 - 277606 |
| V $\alpha$ 4.6  | 401474 - 401188 | V $\alpha$ 15.3  | 276084 - 275794 |
| V $\alpha$ 8.15 | 398886 - 398594 | V $\alpha$ 15.4  | 273068 - 272779 |
| V $\alpha$ 4.7  | 394466 - 394177 | V $\alpha$ 15.5  | 270770 - 270468 |
| V $\alpha$ 4.8  | 391014 - 390726 | V $\alpha$ 15.6  | 267725 - 267439 |
| V $\alpha$ 4.9  | 388654 - 388408 | V $\alpha$ 15.7  | 265404 - 265115 |
| V $\alpha$ 4.10 | 384388 - 384102 | V $\alpha$ 15.8  | 258140 - 257851 |
| V $\alpha$ 11.1 | 383520 - 383228 | V $\alpha$ 15.9  | 255001 - 254700 |
| V $\alpha$ 11.2 | 376674 - 376376 | V $\alpha$ 15.10 | 258152 - 257851 |

**Cont. Supplementary Table 1. Location of the platypus TCR $\alpha$ / $\delta$  V gene segments in Scaffold 588 of the current assembly (*Ornithorhynchus anatinus*-5.0.).**

|                  |                 |                |                 |
|------------------|-----------------|----------------|-----------------|
| V $\alpha$ 15.11 | 255001 - 254699 | V $\delta$ 1.4 | 220713 - 220420 |
| V $\alpha$ 15.12 | 252107 - 251817 | V $\delta$ 1.5 | 218956 - 218667 |
| V $\alpha$ 15.13 | 248282 - 247982 | V $\delta$ 1.6 | 216368 - 216080 |
| V $\alpha$ 16    | 245943 - 245653 | V $\delta$ 1.7 | 214329 - 214041 |
| V $\alpha$ 17    | 237310 - 237030 | V $\delta$ 1.8 | 211531 - 211240 |
| V $\delta$ 1.1   | 231932 - 231643 | V $\delta$ 1.9 | 207635 - 207329 |
| V $\delta$ 1.2   | 226089 - 225796 | VH $\delta$    | 203484 - 203182 |
| V $\delta$ 1.3   | 223137 - 222847 | V $\delta$ 2   | 154694 - 154993 |

**Location of the platypus TCR $\alpha$ / $\delta$  D and J gene segments and C $\delta$  in Scaffold 588 of the current assembly (*Ornithorhynchus anatinus*-5.0.).**

|              |                 |            |                 |
|--------------|-----------------|------------|-----------------|
| D $\delta$ 1 | 197651 - 197573 | J $\alpha$ | 140204 - 140099 |
| D $\delta$ 2 | 193772 - 193693 | J $\alpha$ | 139289 - 139174 |
| J $\delta$ 1 | 192668 - 192581 | J $\alpha$ | 138530 - 138426 |
| J $\delta$ 2 | 190486 - 190385 | J $\alpha$ | 136648 - 136557 |
| J $\delta$ 3 | 187971 - 187877 | J $\alpha$ | 135920 - 135824 |
| J $\delta$ 4 | 185590 - 185497 | J $\alpha$ | 134709 - 134614 |
| J $\delta$ 5 | 183266 - 183178 | J $\alpha$ | 132987 - 132893 |
| J $\delta$ 6 | 181080 - 180987 | J $\alpha$ | 132526 - 132427 |
| J $\delta$ 7 | 178965 - 178863 | J $\alpha$ | 130993 - 130897 |
| C $\delta$   | 165657 - 165353 | J $\alpha$ | 128336 - 128240 |
|              |                 | J $\alpha$ | 126922 - 126819 |
| J $\alpha$   | 150769 - 150672 | J $\alpha$ | 125256 - 125167 |
| J $\alpha$   | 150077 - 149982 | J $\alpha$ | 124739 - 124633 |
| J $\alpha$   | 149647 - 149548 | J $\alpha$ | 120905 - 120794 |
| J $\alpha$   | 149453 - 149363 | J $\alpha$ | 118640 - 118546 |
| J $\alpha$   | 148176 - 148084 | J $\alpha$ | 117376 - 117291 |
| J $\alpha$   | 146619 - 146525 | J $\alpha$ | 113181 - 113086 |
| J $\alpha$   | 145223 - 145134 | J $\alpha$ | 112175 - 112075 |
| J $\alpha$   | 142912 - 142822 | J $\alpha$ | 110085 - 109985 |
| J $\alpha$   | 141900 - 141813 | J $\alpha$ | 108422 - 108336 |
| J $\alpha$   | 141191 - 141096 |            |                 |

**Location of the platypus TCR $\alpha$  J gene segments and C $\alpha$  in UltraContig 684 of the current assembly (*Ornithorhynchus anatinus*-5.0.).**

|            |               |
|------------|---------------|
| J $\alpha$ | 33057 - 32961 |
| J $\alpha$ | 31748 - 31653 |
| C $\alpha$ | 29891 - 29629 |
